# Supplementary material for: Adverse events associated with home use of mouthrinses: a systematic review
Source: PubMed Central journal article supplement — Ther Adv Drug Saf. 2019 Sep 23;10:2042098619854881. doi: 10.1177/2042098619854881 (PMC6759706; doi:10.1177/2042098619854881), 2019-09-23
Supplement: review_MW_Supplementary_Table_1_final.pdf [file review_MW_Supplementary_Table_1_final.pdf]

**Supplementary Table 1.** Included studies classified according to the active ingredient in the test product. Studies testing more than one active molecule are shaded in grey.

| Miscellanea (n=8)               | Delmopinol (n=7)              | Fluorides (n=10)                    | Diclofenac (n=2)               | Natural products (n=7)         | Triclosan (n=7)               | CHX (n=42)                      |                                     | EO (n=18)                       | CPC (n=20)                          |
|---------------------------------|-------------------------------|-------------------------------------|--------------------------------|--------------------------------|-------------------------------|---------------------------------|-------------------------------------|---------------------------------|-------------------------------------|
| Bolanowski (1995) <sup>88</sup> | Claydon (1996) <sup>87</sup>  | Bascones (2005) <sup>11</sup>       | Agarwal (2010) <sup>79</sup>   | Bhat (2014) <sup>73</sup>      | Almerich (2005) <sup>75</sup> | Bascones (2005) <sup>11</sup>   | Jose (2015) <sup>45</sup>           | Bagan (2012) <sup>42</sup>      | Albert-Kiszely (2007) <sup>29</sup> |
| De Nardo (2012) <sup>95</sup>   | Collaert (1992) <sup>74</sup> | Brex (1993) <sup>56</sup>           | Weinstein (2001) <sup>80</sup> | Duss (2010) <sup>48</sup>      | Kumar (2013) <sup>63</sup>    | Bernardi (2004) <sup>52</sup>   | Joyston-Bechal (1993) <sup>72</sup> | Borden (2002) <sup>37</sup>     | Bascones (2005) <sup>11</sup>       |
| Lorenz (2009) <sup>47</sup>     | Hase (1995) <sup>85</sup>     | Ciancio (1992) <sup>83</sup>        |                                | Gupta (2014) <sup>60</sup>     | Lang (2002) <sup>46</sup>     | Bhat (2014) <sup>73</sup>       | Kim (2002) <sup>66</sup>            | Botelho (2009) <sup>38</sup>    | Cortelli (2012) <sup>22</sup>       |
| Preshaw (1998) <sup>92</sup>    | Hase (1995) <sup>86</sup>     | Guarnelli (2004) <sup>81</sup>      |                                | Gupta (2014) <sup>61</sup>     | Moran (1997) <sup>32</sup>    | Brex (1993) <sup>56</sup>       | Kumar (2013) <sup>63</sup>          | Charles (2001) <sup>39</sup>    | Cortelli (2013) <sup>23</sup>       |
| Scully (1999) <sup>91</sup>     | Hase (1998) <sup>64</sup>     | Hasturk (2004) <sup>82</sup>        |                                | Pereira (2011) <sup>62</sup>   | Ros-Llor (2014) <sup>34</sup> | Charles (2004) <sup>57</sup>    | Lang (1998) <sup>44</sup>           | Charles (2004) <sup>57</sup>    | Cortelli (2014) <sup>24</sup>       |
| Tombes (1993) <sup>90</sup>     | Lang (1998) <sup>44</sup>     | Horwitz (2000) <sup>65</sup>        |                                | Samuels (2012) <sup>14</sup>   | Schaeken (1996) <sup>76</sup> | Claydon (2001) <sup>43</sup>    | Lang (2002) <sup>46</sup>           | Cortelli (2012) <sup>22</sup>   | Costa (2013) <sup>15</sup>          |
| Van Dyke (2002) <sup>93</sup>   | Yeung (1995) <sup>94</sup>    | Kumar (2013) <sup>63</sup>          |                                | Tenenbaum (1999) <sup>78</sup> | Waler (1993) <sup>77</sup>    | Collaert (1992) <sup>74</sup>   | Leyes Borrajo (2002) <sup>70</sup>  | Cortelli (2013) <sup>23</sup>   | Escribano (2010) <sup>18</sup>      |
| Zahradnik (2009) <sup>89</sup>  |                               | Joyston-Bechal (1993) <sup>72</sup> |                                |                                |                               | Cortellini (2008) <sup>53</sup> | Lorenz (2006) <sup>71</sup>         | Cortelli (2014) <sup>24</sup>   | Herrera (2005) <sup>20</sup>        |
|                                 |                               | Yates (1998) <sup>25</sup>          |                                |                                |                               | Duss (2010) <sup>48</sup>       | Lorenz (2009) <sup>47</sup>         | Cosyn (2013) <sup>41</sup>      | Hu (2009) <sup>21</sup>             |
|                                 |                               | Zimmermann (1993) <sup>84</sup>     |                                |                                |                               | Eldridge (1998) <sup>36</sup>   | Moran (1991) <sup>31</sup>          | Eldridge (1998) <sup>36</sup>   | Hu (2003) <sup>13</sup>             |
|                                 |                               |                                     |                                |                                |                               | Ernst (1998) <sup>49</sup>      | Olsson (2012) <sup>50</sup>         | Kerr (2015) <sup>40</sup>       | Mankodi (2005) <sup>26</sup>        |
|                                 |                               |                                     |                                |                                |                               | Ernst (2005) <sup>58</sup>      | Pereira (2011) <sup>62</sup>        | Lauten (2005) <sup>33</sup>     | Parikh-Das (2013) <sup>35</sup>     |
|                                 |                               |                                     |                                |                                |                               | Escribano (2010) <sup>18</sup>  | Quirynen (2001) <sup>27</sup>       | Moran (1991) <sup>31</sup>      | Quirynen (2001) <sup>27</sup>       |
|                                 |                               |                                     |                                |                                |                               | Graziani (2015) <sup>54</sup>   | Ros-Llor (2014) <sup>34</sup>       | Moran (1997) <sup>32</sup>      | Rioboo (2012) <sup>12</sup>         |
|                                 |                               |                                     |                                |                                |                               | Gupta (2014) <sup>60</sup>      | Santhosh (2010) <sup>51</sup>       | Parikh-Das (2013) <sup>35</sup> | Samuels (2012) <sup>14</sup>        |
|                                 |                               |                                     |                                |                                |                               | Gupta (2014) <sup>61</sup>      | Santos (2004) <sup>17</sup>         | Ros-Llor (2014) <sup>34</sup>   | Santos (2004) <sup>17</sup>         |
|                                 |                               |                                     |                                |                                |                               | Gürgan (2006) <sup>67</sup>     | Sharma (2003) <sup>59</sup>         | Samuels (2012) <sup>14</sup>    | Stookey (2005) <sup>28</sup>        |
|                                 |                               |                                     |                                |                                |                               | Hase (1998) <sup>64</sup>       | Solís (2011) <sup>55</sup>          | Witt (2005) <sup>30</sup>       | Van Leeuwen (2015) <sup>16</sup>    |
|                                 |                               |                                     |                                |                                |                               | Horwitz (2000) <sup>65</sup>    | Stookey (2005) <sup>28</sup>        |                                 | Witt (2005) <sup>30</sup>           |
|                                 |                               |                                     |                                |                                |                               | Hu (2009) <sup>21</sup>         | Türkoğlu (2009) <sup>68</sup>       |                                 | Yates (1998) <sup>25</sup>          |
|                                 |                               |                                     |                                |                                |                               | Jenkins (1993) <sup>69</sup>    | Zimmer (2015) <sup>19</sup>         |                                 |                                     |

CHX: Chlorhexidine ; EO: essential Oils; CPC: Cetylpyridinium Chloride
