# Supplementary material for: Adverse events associated with home use of mouthrinses: a systematic review
Source: PubMed Central journal article supplement — Ther Adv Drug Saf. 2019 Sep 23;10:2042098619854881. doi: 10.1177/2042098619854881 (PMC6759706; doi:10.1177/2042098619854881), 2019-09-23
Supplement: review_MW_Supplementary_Table_2_final.pdf [file review_MW_Supplementary_Table_2_final.pdf]

**Supplementary Table 2.** Description of studies, intervention and comparators, duration of follow-up and numerical results for adverse effects (where present).

| Publication and Study Design                                                          | Intervention and Comparator                                                | Oral Hygiene Allowed | Tot. Sample Size Baseline | Study Duration | Reported Adverse Events (AE)                                                                                                                       |
|---------------------------------------------------------------------------------------|----------------------------------------------------------------------------|----------------------|---------------------------|----------------|----------------------------------------------------------------------------------------------------------------------------------------------------|
| Bolanowski (1995) <sup>88</sup><br>Crossover with 3 products                          | Clear Choice and other ethanol oral rinses                                 | N/A                  | 13                        | 1 day          | No AE                                                                                                                                              |
| De Nardo (2012) <sup>95</sup><br>Parallel with 2 arms                                 | 0.05% sodium hypochlorite                                                  | Yes                  | 40                        | 21 days        | brown tooth staining 100%, redness of tongue 35%, bleach taste 100%, burning sensation 45%                                                         |
|                                                                                       | Distilled water                                                            |                      |                           |                | brown tooth staining 35.0%                                                                                                                         |
| Lorenz (2009) <sup>47</sup><br>Randomized                                             | N-chlorotaurine (NCT) 2% + 3%                                              | No                   | 80                        | 4 days         | unpleasant taste 40; brownish tongue 5                                                                                                             |
|                                                                                       | Placebo + 0.2% chlorhexidine                                               |                      |                           |                | no AE                                                                                                                                              |
| Preshaw (1998) <sup>92</sup><br>Randomized, double-blind, placebo-controlled parallel | 0.1% ketorolac tromethamine                                                | Yes                  | 42                        | 6 weeks        | Reversible oral ulceration 4                                                                                                                       |
|                                                                                       | Placebo                                                                    |                      |                           |                | Reversible oral ulceration 4                                                                                                                       |
| Scully (1999) <sup>91</sup><br>Randomized, double blind parallel of 5 groups          | MMPP monoperoxyphthalate with or without sodium lauryl sulphate            | Yes                  | 131                       | 8 weeks        | erythematous mucosal candida infection 1<br>erythematous mucosal areas 17; mild oral soreness or dryness or burning sensation of the oral mucosa 8 |
|                                                                                       | Placebo                                                                    |                      |                           |                | erythematous mucosal candidal infection 1; erythematous mucosal areas 1<br>mild oral soreness or dryness or burning sensation of the oral mucosa 1 |
| Tombes (1993) <sup>90</sup><br>Parallel with 3 groups                                 | 0.75% H <sub>2</sub> O <sub>2</sub> and 1.5% H <sub>2</sub> O <sub>2</sub> | N/A                  | 25                        | 5 weeks        | tongue staining 84%; elongation of papillae 80%                                                                                                    |
|                                                                                       | Saline solution                                                            |                      |                           |                | No AE                                                                                                                                              |
| Van Dyke (2002) <sup>93</sup><br>Double blinded parallel                              | 0.03% CPC                                                                  | No                   | 294                       | 4 weeks        | nausea and vomiting, migraine 1                                                                                                                    |
|                                                                                       | 0.01% P-histatin P-113 peptide                                             |                      |                           |                | back pain 1                                                                                                                                        |
|                                                                                       | Placebo                                                                    |                      |                           |                | Severe coated tongue 1                                                                                                                             |
| Zahradnik (2009) <sup>89</sup><br>Only treated patients, open-label                   | Probiotic mouth rinse low dose followed by high dose                       | Yes                  | 19                        | 4-8 weeks      | slight tingle in the throat 2; sore throat 2; cold sore/ulcer 2; headache 1; stomach ache 1                                                        |
|                                                                                       | Probiotic mouth rinse high dose                                            |                      |                           |                | sore throat 2; mouth sore/fever blister 4; headache 1; cough 2; congestion 1                                                                       |

|                                                                                                        |                                                                  |     |     |                   |                                                                                                                                                                                                                                                                                                                                                 |
|--------------------------------------------------------------------------------------------------------|------------------------------------------------------------------|-----|-----|-------------------|-------------------------------------------------------------------------------------------------------------------------------------------------------------------------------------------------------------------------------------------------------------------------------------------------------------------------------------------------|
| Claydon (1996) <sup>87</sup><br>Placebo parallel blind randomized                                      | Delmopinol 0.1% and 0.2%                                         | Yes | 450 | 3 + 6 months      | tongue discoloration 3 months 2; 6 months 4<br>taste disturbance 3 months 94; 6 months 38<br>tongue numbness 3 months 220; 6 months 91<br>desquamation/soreness 3 months 8; 6 months 5                                                                                                                                                          |
|                                                                                                        | Placebo                                                          |     |     |                   | taste disturbance 3 months 5; months 1<br>tongue numbness 3 months 7; 6 months 2<br>desquamation/soreness 3 months 2                                                                                                                                                                                                                            |
| Collaert (1992) <sup>4</sup><br>Parallel with 4 arms - only 2 arms for AE                              | Delmopinol (0.05%, 0.1%, 0.2%)                                   | No  | 48  | 14 days           | No AE reported                                                                                                                                                                                                                                                                                                                                  |
|                                                                                                        | 0.2% CHX                                                         |     |     |                   |                                                                                                                                                                                                                                                                                                                                                 |
| Hase (1995) <sup>85</sup><br>Parallel with 3 arms                                                      | 2 mg/ml Delmopinol hydrochloride + NaOH at pH 5.7                | Yes | 149 | 4 weeks           | Taste, staining of teeth/tongue, vesicles/ulcerations, burning sensation, and transient anaesthetic sensation compared between test and placebo groups by VAS scale. Higher scores for taste reported by test and PC groups than NC. Staining more in PC group than test and NC group. More anaesthetic sensation in test group than NC and PC. |
|                                                                                                        | Negative control (NC): Placebo                                   |     |     |                   |                                                                                                                                                                                                                                                                                                                                                 |
|                                                                                                        | Positive control (PC): 2 mg/ml CHX digluconate                   |     |     |                   |                                                                                                                                                                                                                                                                                                                                                 |
| Hase (1995) <sup>86</sup><br>Crossover with 2 arms                                                     | 2 mg/ml Delmopinol hydrochloride + 1.5% ethanol, NaOH            | No  | 28  | 2 weeks           | Frequencies were not reported, Except vesicles/ulceration, test group had significantly higher score for all AE recorded                                                                                                                                                                                                                        |
|                                                                                                        | Placebo                                                          |     |     |                   |                                                                                                                                                                                                                                                                                                                                                 |
| Hase (1998) <sup>64</sup><br>Parallel with 3 arms                                                      | 2 mg/ml Delmopinol hydrochloride + 1.5% ethanol, NaOH            | Yes | 140 | 6 months          | local anaesthesia/hypoesthesia/paraesthesia 3 months 31%; 6 months 22%<br>taste loss/taster perversion paraesthesia 3 months 17%; 6 months 24%<br>discoloration of teeth or tongue 3 months 4%; 6 months 8%                                                                                                                                     |
|                                                                                                        | Hydrochloride + 1.5% ethanol, 2 mg/ml CHX digluconate or placebo |     |     |                   | local anaesthesia/hypoesthesia/paraesthesia CHX: 3 months 13%; 6 months 18%<br>taste loss/taste perversion CHX 3 months 10%; 6 months 16%<br>discoloration of teeth or tongue placebo 3 months 2%; 6 months 7%; CHX 3 months 16%; 6 months 13%                                                                                                  |
| Lang (1998) <sup>45</sup><br>Randomized parallel double blind with 3 arms<br>See Supplementary Table 3 | Delmopinol hydrochloride 2.0 mg                                  | Yes | 156 | 6 months          | local anaesthesia/hypoesthesia/paraesthesia 3 months 24%; 6 months 8%<br>taste loss/taste perversion paraesthesia 3 months 35%; 6 months 20%<br>discoloration of teeth or tongue 3 months 20%; 6 months 16%                                                                                                                                     |
|                                                                                                        | Placebo                                                          |     |     |                   | local anaesthesia/hypoesthesia/paraesthesia placebo 3 months 4%; CHX: 3 months 21%; 6 months 5%<br>taste loss/taster perversion placebo group 3 months 2%, chx group 3 months 35%; 6 months 14%<br>discoloration of teeth or tongue placebo 3 months 8%; 6 months 6%; CHX 3 months 69%; 6 months 88%                                            |
|                                                                                                        | CHX digluconate 2.0 mg                                           |     |     |                   |                                                                                                                                                                                                                                                                                                                                                 |
| Yeung (1995) <sup>94</sup><br>Double-blind parallel with 2 arms<br>See Supplementary Table 3           | Delmopinol 2 mg/ml HCL                                           | N/A | 47  | 28 days           | tongue numbness 12; oral mucosa desquamation 3; burning sensation 1; taste loss 1; altered taste 3; oral ulcer 2                                                                                                                                                                                                                                |
|                                                                                                        | Placebo                                                          |     |     |                   | oral mucosa desquamation 1; oral ulcer 4; sore gums 2                                                                                                                                                                                                                                                                                           |
| Bascones (2005) <sup>11</sup><br>Double masked crossover with 3 phases<br>See Supplementary Table 3    | 0.12% CHX + 0.05% NaF                                            | No  | 30  | 21 days per phase | tongue staining 5; burning pain 1; aphthous ulcer 3                                                                                                                                                                                                                                                                                             |
|                                                                                                        | 0.12% CHX                                                        |     |     |                   | tongue staining 12; dysgeusia 1; dental hypersensitivity 1; aphthous ulcer 1; labial herpes 1; tongue ulcer; cracked lip 1                                                                                                                                                                                                                      |

|                                                                                                         |                                                                                                                                            |     |     |          |                                                                                                                                                                                                         |
|---------------------------------------------------------------------------------------------------------|--------------------------------------------------------------------------------------------------------------------------------------------|-----|-----|----------|---------------------------------------------------------------------------------------------------------------------------------------------------------------------------------------------------------|
| Brecx (1993) <sup>56</sup><br>Triple blinded parallel randomized<br>See Supplementary Table 3           | 125 ppm F from americium fluoride and 125 ppm F from stannous fluoride, 5.0% alcohol, 0.025% aspartame                                     | Yes | 29  | 3 months | Teeth staining as discoloration index, no frequencies reported                                                                                                                                          |
|                                                                                                         | 0.2% CHX digluconate, 5.0% alcohol                                                                                                         |     |     |          |                                                                                                                                                                                                         |
|                                                                                                         | Placebo                                                                                                                                    |     |     |          |                                                                                                                                                                                                         |
| Ciancio (1992) <sup>83</sup><br>Randomized double-blind<br>See Supplementary Table 3                    | 0.1% stannous fluoride                                                                                                                     | Yes | 55  | 3 weeks  | Tooth staining as Lobene index, no frequencies reported                                                                                                                                                 |
|                                                                                                         | Placebo                                                                                                                                    |     |     |          |                                                                                                                                                                                                         |
| Guarnelli (2004) <sup>81</sup><br>Crossover with 2 arms                                                 | AmF/SnF2                                                                                                                                   | Yes | 18  | 12 weeks | tooth stain: frequency of sites increased from 7.6±8.0% at baseline to 34.9±15.5% at 12 weeks $p<0.001$ for the test mouthrinse, and from 8.3±13.2% to 29.5±21.1% for the control treatment $p<0.001$ . |
|                                                                                                         | mouthrinse containing <1 ppm no description                                                                                                |     |     |          | taste alteration: 1 patient for test mouthrinse; 3 patients for control mouthrinse                                                                                                                      |
| Hasturk (2004) <sup>82</sup><br>Parallel with 2 arms                                                    | Fluoridated hydrogen peroxide                                                                                                              | Yes | 99  | 6 months | No AE reported                                                                                                                                                                                          |
|                                                                                                         | Placebo                                                                                                                                    |     |     |          |                                                                                                                                                                                                         |
| Horwitz (2000) <sup>65</sup><br>Parallel double blind<br>See Supplementary Table 3                      | Americium fluoride/stannous fluoride AmF/SnF2                                                                                              | Yes | 32  | 12 weeks | Tooth staining (as % of teeth with no visible staining): 3 weeks 0.47 ±0.21; 12 weeks 0.72 ± 0.19                                                                                                       |
|                                                                                                         | 0.12% CHX                                                                                                                                  |     |     |          | 3 weeks: 1.12 ± 0.19; 6 weeks: 0.60 ±0.13                                                                                                                                                               |
| Kumar (2013) <sup>63</sup><br>Randomized parallel double blind with 3 arms<br>See Supplementary Table 3 | 0.2% CHX gluconate                                                                                                                         | Yes | 48  | 21 days  | oral itching 5; oral soreness 4                                                                                                                                                                         |
|                                                                                                         | 0.03% triclosan + 0.025% sodium fluoride NaF + 12% ethyl alcohol                                                                           |     |     |          | oral itching 8; aphthous ulcer 4                                                                                                                                                                        |
|                                                                                                         | 0.2% CHX + 0.3% triclosan + 0.3% NaF + 0.09% Zn chloride ZnCl <sub>2</sub>                                                                 |     |     |          | oral itching 5; dryness 4                                                                                                                                                                               |
| Joyston-Bechal (1993) <sup>72</sup><br>Double-blind randomized parallel with 2 arms                     | 0.05% CHX                                                                                                                                  | Yes | 47  | 8 weeks  | Teeth stain reported                                                                                                                                                                                    |
|                                                                                                         | 0.05% sodium fluoride                                                                                                                      |     |     |          | No AE reported                                                                                                                                                                                          |
| Yates (1998) <sup>25</sup><br>Parallel with 2 arms                                                      | Tripotassium citrate monohydrate 2%; CPC chloride 0.05 yu; sodium fluoride 0.05%; mono and di-sodium phosphates in an aqueous alcohol base | Yes | 83  | 56 days  | oral ulceration, stomatitis for placebo only, gingival redness, dental discoloration in 30%; further not specified                                                                                      |
|                                                                                                         | aqueous alcohol base                                                                                                                       |     |     |          | oral ulceration, stomatitis in 20%; further not specified                                                                                                                                               |
| Zimmermann (1993) <sup>84</sup><br>Double blind parallel                                                | AmF and SnF                                                                                                                                | Yes | 102 | 7 months | ulceration 2                                                                                                                                                                                            |
|                                                                                                         | Flavoring                                                                                                                                  |     |     |          | ulceration 1; mucosal irritation 3                                                                                                                                                                      |
| Agarwal (2010) <sup>79</sup><br>Parallel with 2 Arms                                                    | Diclofenac                                                                                                                                 | N/A | 20  | 7 days   | No AE reported                                                                                                                                                                                          |
|                                                                                                         | Placebo                                                                                                                                    |     |     |          |                                                                                                                                                                                                         |
| Weinstein (2001) <sup>80</sup><br>Parallel with 2 groups                                                | Diclofenac 0.074%                                                                                                                          | N/A | 50  | 7days    | sweet taste 8%                                                                                                                                                                                          |
|                                                                                                         | Placebo                                                                                                                                    |     |     |          | none                                                                                                                                                                                                    |

|                                                                                                    |                                                         |     |     |          |                                                                                                                                                                                     |
|----------------------------------------------------------------------------------------------------|---------------------------------------------------------|-----|-----|----------|-------------------------------------------------------------------------------------------------------------------------------------------------------------------------------------|
| B*hat (2014) <sup>73</sup><br>Parallel with 3 arms                                                 | Herbal                                                  | Yes | 72  | 1 month  | burning 40.9%; taste disturbance 9.1%; discoloration 4.5%                                                                                                                           |
|                                                                                                    | 0.20 % CHX                                              |     |     |          | burning 50%; taste disturbance 45.4%; discoloration 33.4%; dryness 81.8%                                                                                                            |
|                                                                                                    | Saline solution                                         |     |     |          | taste disturbance 63.6%                                                                                                                                                             |
| Duss (2010) <sup>48</sup><br>Randomized parallel with 2 arms<br>See Supplementary Table 3          | 0.05 CHX/herbal extract combination                     | Yes | 45  | 4 weeks  | Only Staining by Lobene index but no frequencies reported                                                                                                                           |
|                                                                                                    | 0.1% CHX                                                |     |     |          |                                                                                                                                                                                     |
| Gupta (2014) <sup>60</sup><br>Parallel with 3 arms                                                 | 10% Terminalia chebula                                  | Yes | 78  | 14 days  | No AE reported                                                                                                                                                                      |
|                                                                                                    | 0.12% CHX                                               |     |     |          |                                                                                                                                                                                     |
|                                                                                                    | Saline solution                                         |     |     |          |                                                                                                                                                                                     |
| Gupta (2014) <sup>61</sup><br>Parallel with 2 arms                                                 | Aloe vera                                               | No  | 100 | 4 days   | no AE                                                                                                                                                                               |
|                                                                                                    | CHX; Saline solution                                    |     |     |          | oral staining CHX 70<br>altered taste CHX 65                                                                                                                                        |
| Pereira (2011) <sup>62</sup><br>Randomized parallel study                                          | EO Ocimum gratissimum                                   | Yes | 30  | 3 months | No AE reported except 30% of volunteers with CHX have unspecified AE                                                                                                                |
|                                                                                                    | Placebo and 0.12% CHX                                   |     |     |          |                                                                                                                                                                                     |
| Samuels (2012) <sup>14</sup><br>prospective, double-<br>blinded, randomized,<br>placebo-controlled | proprietary mixture of herbs HM-302<br>alcohol free     | No  | 62  | 2 weeks  | tooth staining 3; mouth sensitivity 1                                                                                                                                               |
|                                                                                                    | CPC                                                     |     |     |          | tooth staining 4; taste alteration 1; burning 1; mouth sensitivity 1                                                                                                                |
|                                                                                                    | EO                                                      |     |     |          | tooth staining 5; taste alteration 1; burning 7                                                                                                                                     |
|                                                                                                    | water flavoured solution                                |     |     |          | tooth staining 2; taste alteration 2                                                                                                                                                |
| Tenenbaum (1999) <sup>78</sup><br>Double blind parallel                                            | 0.075% vs 0.03% sanguinarine                            | Yes | 60  | 14 weeks | No AE reported                                                                                                                                                                      |
|                                                                                                    | Not specified                                           |     |     |          |                                                                                                                                                                                     |
| Almerich (2005) <sup>75</sup><br>Double-blind crossover                                            | Alcoholic triclosan                                     | No  | 29  | 21 days  | teeth staining 16; oral itching 1; oral soreness 2; dry mouth 1                                                                                                                     |
|                                                                                                    | Non alcoholic triclosan                                 |     |     |          | teeth staining 8; oral itching 7; aphthous ulcer 1                                                                                                                                  |
| Lang (2002) <sup>46</sup><br>Parallel with 4 arms                                                  | C=0.045% triclosan in ethanol;<br>D=0.12% CHX (Peridex) | No  | 185 | 21 days  | Teeth staining in 3 groups: Triclosan Placebo; CHX; Triclosan,<br>Ulcer in 2 groups: CHX Placebo; Triclosan<br>Tongue lesion in 1 group: CHX Placebo<br>Leukoplakia in 1 group: CHX |
|                                                                                                    | A=ethanol placebo;<br>B=CHX placebo                     |     |     |          |                                                                                                                                                                                     |
| Moran (1997) <sup>32</sup><br>Triple crossover                                                     | Triclosan                                               | No  | 32  | 4 days   | No AE reported                                                                                                                                                                      |
|                                                                                                    | EO                                                      |     |     |          |                                                                                                                                                                                     |
|                                                                                                    | Placebo                                                 |     |     |          |                                                                                                                                                                                     |
| Ros-Llor (2014) <sup>34</sup><br>Double-blind, prospective,<br>randomized                          | Triclosan                                               | Yes | 80  | 15 days  | Burning 1                                                                                                                                                                           |
|                                                                                                    | CHX                                                     |     |     |          | Teeth staining 1; burning 1                                                                                                                                                         |
|                                                                                                    | EO                                                      |     |     |          | Burning 1                                                                                                                                                                           |
|                                                                                                    | Placebo                                                 |     |     |          | NEOo AE                                                                                                                                                                             |
| Schaecken (1996) <sup>76</sup><br>Parallel controlled                                              | 0.4% zinc sulphate+0.15 triclosan                       | Yes | 296 | 28 weeks | teeth staining 28, mucosal irritation 42, taste change 78, leukoplakia 1, oral sensation 1, asthmatic reaction                                                                      |
|                                                                                                    | Fluoride                                                |     |     |          | teeth staining 2, mucosal irritation 29, taste change 53                                                                                                                            |

|                                                                                                         |                                                                                                                                      |     |     |                 |                                                                                                                                                                                                                                                             |
|---------------------------------------------------------------------------------------------------------|--------------------------------------------------------------------------------------------------------------------------------------|-----|-----|-----------------|-------------------------------------------------------------------------------------------------------------------------------------------------------------------------------------------------------------------------------------------------------------|
| Waalder (1993) <sup>77</sup><br>Crossover                                                               | propylene glycol (1:8 in water) + 0.3% triclosan + 1.5% sodium lauryl sulfate                                                        | No  | 11  | 4 days          | No AE                                                                                                                                                                                                                                                       |
|                                                                                                         | propylene glycol (1:8 in water) + 1.5% sodium lauryl sulfate                                                                         |     |     |                 | Oral mucosa exfoliation/desquamation 64%                                                                                                                                                                                                                    |
|                                                                                                         | propylene glycol (1:8 in water) + 0.15% triclosan + 1.5% sodium lauryl sulfate                                                       |     |     |                 | No AE                                                                                                                                                                                                                                                       |
|                                                                                                         | propylene glycol (1:8 in water) as a placebo                                                                                         |     |     |                 | No AE                                                                                                                                                                                                                                                       |
| Bernardi (2004) <sup>52</sup><br>Crossover                                                              | 0.2% CHX + ADS                                                                                                                       | N/A | 15  | 15 days         | No AE                                                                                                                                                                                                                                                       |
|                                                                                                         | 0.2% CHX                                                                                                                             |     |     |                 |                                                                                                                                                                                                                                                             |
|                                                                                                         | Water                                                                                                                                |     |     |                 |                                                                                                                                                                                                                                                             |
| Charles (2004) <sup>57</sup><br>Randomized blind parallel<br>See Supplementary Table 3                  | EO                                                                                                                                   | Yes | 180 | 6 months        | Only mean Lobene tooth stain index reported, no frequencies                                                                                                                                                                                                 |
|                                                                                                         | 0.12% CHX                                                                                                                            |     |     |                 |                                                                                                                                                                                                                                                             |
|                                                                                                         | 5% alcohol                                                                                                                           |     |     |                 |                                                                                                                                                                                                                                                             |
| Claydon (2001) <sup>43</sup><br>Randomized crossover                                                    | (B) 0.03% CHX<br>(C) 0.06% CHX<br>(D) 0.06% CHX, 1.2% PVP<br>(E) 0.06% CHX, 5% PVP<br>(F) 0.06% CHX 10%, PVP.<br>(A) aqueous alcohol | No  | 72  | 1 day           | No AE reported                                                                                                                                                                                                                                              |
|                                                                                                         |                                                                                                                                      |     |     |                 |                                                                                                                                                                                                                                                             |
| Cortellini (2008) <sup>53</sup><br>Cross over and 2 arms<br>See Supplementary Table 3                   | 0.2% CHX+ADS                                                                                                                         | No  | 48  | 1 week each arm | Teeth staining 1 <sup>st</sup> week: 2/23 in Incisal, 9/23 in approx, 2/23 in gingiva; 2 <sup>nd</sup> week: 6/24 in Incisal, 15/24 in approx, 5/24 in gingiva<br>1 <sup>st</sup> week: gingival inflammation 35%; oedema 35%; mucosal irritation 1.0%      |
|                                                                                                         | 0.2% CHX                                                                                                                             |     |     |                 | Teeth staining 1 <sup>st</sup> week: 17/24 in Incisal, 20/24 in approx, 14/24 in gingiva; 2 <sup>nd</sup> week: 12/23 in Incisal, 22/23 in approx, 12/23 in gingiva<br>1 <sup>st</sup> week: gingival inflammation 21%; oedema 42%; mucosal irritation 1.0% |
| Eldridge (1998) <sup>36</sup><br>Parallel 3 arms<br>See Supplementary Table 3                           | 0.12% alcohol free CHX                                                                                                               | No  | 32  | 21 days         | brown hairy tongue: 80%                                                                                                                                                                                                                                     |
|                                                                                                         | EO                                                                                                                                   |     |     |                 | brown hairy tongue: 9.10%                                                                                                                                                                                                                                   |
|                                                                                                         | 0.12% CHX                                                                                                                            |     |     |                 | brown hairy tongue: 54.50%                                                                                                                                                                                                                                  |
| Ernst (1998) <sup>49</sup><br>Parallel randomized 2 arms<br>See Supplementary Table 3                   | 0.2% CHX Gluconate                                                                                                                   | Yes | 130 | 4 weeks         | teeth staining increased from 30.4% to 45.2%, mucosal irritation 1.5%, taste change 27.60%                                                                                                                                                                  |
|                                                                                                         | 0.1% CHX                                                                                                                             |     |     |                 | teeth staining increased from 34.2% to 48.4%, taste change 18.40%                                                                                                                                                                                           |
| Ernst (2005) <sup>38</sup><br>Parallel randomized double-blind with 3 arms<br>See Supplementary Table 3 | CHX                                                                                                                                  | Yes | 90  | 4 weeks         | mucosal irritation 5                                                                                                                                                                                                                                        |
|                                                                                                         | Hexatidine                                                                                                                           |     |     |                 | mucosal irritation 2, bad taste 8                                                                                                                                                                                                                           |
|                                                                                                         | Placebo                                                                                                                              |     |     |                 | bad taste 18                                                                                                                                                                                                                                                |
| Escribano (2010) <sup>18</sup><br>Parallel 2 arms<br>See Supplementary Table 3                          | 0.05% CHX digluconate+0.05% CPC                                                                                                      | Yes | 47  | 3 months        | VAS (visual analogue scale) 0 (no problem)-10 (the highest possible problem)<br>oral pain VAS0: 5; VAS 1-4: 6; VAS 5-10: 8<br>dryness VAS 0: 8; VAS 1-4: 4; VAS 5-10: 4<br>bad taste 2                                                                      |
|                                                                                                         | Placebo                                                                                                                              |     |     |                 | oral pain VAS0: 5; VAS 1-4: 6; VAS 5-10: 8<br>dryness VAS 0: 10; VAS 1-4: 2; VAS5-10: 5                                                                                                                                                                     |
| Graziani (2015) <sup>54</sup><br>Parallel 4 arms                                                        | CHX+Alcohol                                                                                                                          | Yes | 55  | 35 days         | tongue staining 2, taste alternation 4, gastric acidity 1                                                                                                                                                                                                   |
|                                                                                                         | CHX                                                                                                                                  |     |     |                 | tongue staining 1, taste alternation 2                                                                                                                                                                                                                      |
|                                                                                                         | CHX+ADS                                                                                                                              |     |     |                 | tongue staining 2, taste alternation 4                                                                                                                                                                                                                      |
|                                                                                                         | Saline (Placebo)                                                                                                                     |     |     |                 | no AE                                                                                                                                                                                                                                                       |

|                                                                                                                                 |                                                                           |     |     |           |                                                                                                                                                                                                                                                                                                                                                                                                            |
|---------------------------------------------------------------------------------------------------------------------------------|---------------------------------------------------------------------------|-----|-----|-----------|------------------------------------------------------------------------------------------------------------------------------------------------------------------------------------------------------------------------------------------------------------------------------------------------------------------------------------------------------------------------------------------------------------|
| Gürgan (2006) <sup>67</sup><br>Parallel 2 arms<br>See Supplementary Table 3                                                     | 0.2% CHX                                                                  | Yes | 80  | 7 days    | Numerous AE reported. After 3 days of use, more tooth staining, mucosal, gingival and tongue discoloration and taste alteration were observed in subjects using CHX; alterations increased with the duration of CHX use while no changes happened in the placebo group. Significant correlations between the discolorations of tongue and tooth surfaces reported by the patients and clinically detected. |
|                                                                                                                                 | Placebo                                                                   |     |     |           |                                                                                                                                                                                                                                                                                                                                                                                                            |
| Hu (2009) <sup>21</sup><br>Parallel random                                                                                      | 0.05% CPC                                                                 | Yes | 117 | 2 weeks   | No AE occurred                                                                                                                                                                                                                                                                                                                                                                                             |
|                                                                                                                                 | Fluoride                                                                  |     |     |           |                                                                                                                                                                                                                                                                                                                                                                                                            |
| Jenkins (1993) <sup>69</sup><br>Double blinded parallel randomized<br>See Supplementary Table 3                                 | 0.12% CHX+NaF                                                             | Yes | 102 | 42 days   | stain area: 49% (objective), 82% (subjective); stain intensity 1.03 (buccal), 1.06 (lingual) soreness 2                                                                                                                                                                                                                                                                                                    |
|                                                                                                                                 | Placebo                                                                   |     |     |           | stain area: 4% (objective) 14% (subjective); stain intensity 0.14 (buccal), 0.42 (lingual) soreness 1                                                                                                                                                                                                                                                                                                      |
| Jose (2015) <sup>45</sup><br>Parallel randomized                                                                                | CHX+Alcohol                                                               | Yes | 324 | 42 days   | glossodynia 4.6%; tongue coating 11.1%; dry mouth 3.7%; augeusia 2.8%; dysgeusia 2.8%                                                                                                                                                                                                                                                                                                                      |
|                                                                                                                                 | CHX without Alcohol                                                       |     |     |           | glossodynia 5.5%; tongue coating 7.3%; dry mouth 4.6%; augeusia 5.5%                                                                                                                                                                                                                                                                                                                                       |
|                                                                                                                                 | Only brushing                                                             |     |     |           | tongue coating 1.9%                                                                                                                                                                                                                                                                                                                                                                                        |
| Kim (2002) <sup>66</sup><br>Double blinded parallel                                                                             | Dxamase dextranase + amylase                                              | N/A | 26  | 21 days   | No specific AE reported, only less AE with dxamase vs CHX 0.12%                                                                                                                                                                                                                                                                                                                                            |
|                                                                                                                                 | CHX 0.12%                                                                 |     |     |           |                                                                                                                                                                                                                                                                                                                                                                                                            |
| Leyes Borrajo (2002) <sup>70</sup><br>Double blind 3 parallel groups<br>See Supplementary Table 3                               | 0.12% CHX +Alcohol                                                        | Yes | 96  | 28 days   | teeth staining 27; burning 4; taste change 2                                                                                                                                                                                                                                                                                                                                                               |
|                                                                                                                                 | 0.12 CHX without alcohol                                                  |     |     |           | teeth staining 30; foaming 6; ulcer 3; unpleasant taste 3                                                                                                                                                                                                                                                                                                                                                  |
|                                                                                                                                 | Placebo                                                                   |     |     |           | burning 3; ulcer 9; dryness 3                                                                                                                                                                                                                                                                                                                                                                              |
| Lorenz (2006) <sup>71</sup><br>Randomized placebo-controlled parallel double blind                                              | 0.2% CHX                                                                  | Yes | 90  | 21 days   | In all groups: tongue staining 40; dental hypersensitivity 3; ulcer 3; taste change 12                                                                                                                                                                                                                                                                                                                     |
|                                                                                                                                 | 0.2% CHX+ 0.055% NaF                                                      |     |     |           |                                                                                                                                                                                                                                                                                                                                                                                                            |
|                                                                                                                                 | 0.2% CHX+ Alcohol                                                         |     |     |           |                                                                                                                                                                                                                                                                                                                                                                                                            |
|                                                                                                                                 | Placebo                                                                   |     |     |           |                                                                                                                                                                                                                                                                                                                                                                                                            |
| Moran (1991) <sup>31</sup><br>Triple crossover study                                                                            | 0.2% CHX                                                                  | No  | 15  | 19 days   | No AE reported                                                                                                                                                                                                                                                                                                                                                                                             |
|                                                                                                                                 | Phenolic mouthwash                                                        |     |     |           |                                                                                                                                                                                                                                                                                                                                                                                                            |
|                                                                                                                                 | Placebo                                                                   |     |     |           |                                                                                                                                                                                                                                                                                                                                                                                                            |
| Olsson (2012) <sup>50</sup><br>Randomized double-blind crossover<br>See Supplementary Table 3                                   | Alcohol based 0.1% CHX                                                    | No  | 20  | 2 weeks   | Teeth staining as VAS score, no frequencies reported                                                                                                                                                                                                                                                                                                                                                       |
|                                                                                                                                 | Alcohol free 0.12% CHX                                                    |     |     |           |                                                                                                                                                                                                                                                                                                                                                                                                            |
| Quirynen (2001) <sup>27</sup><br>Double-blind, randomised, crossover<br>See Supplementary Table 3                               | CHX 0.12 % alcohol, CHX 0.2 % 0.05% CPC, CHX 0.12 % sodium fluoride 0.05% | No  | 32  | 44 days   | Tooth staining (mean Quigley and Hein score) but no frequencies reported                                                                                                                                                                                                                                                                                                                                   |
|                                                                                                                                 | CHX 0.2 % alcohol                                                         |     |     |           |                                                                                                                                                                                                                                                                                                                                                                                                            |
| Santhosh (2010) <sup>31</sup><br>Randomized double blind crossover<br>See Supplementary Table 3                                 | 0.2% CHX                                                                  | Yes | 24  | 2x21 days | oral itching: 25%; oral soreness: 29%; burning: 8%; ulcer: 20%; dryness: 16%                                                                                                                                                                                                                                                                                                                               |
|                                                                                                                                 | CHX+NaF+ZnCl2                                                             |     |     |           | oral itching: 4%; oral soreness: 25%; burning: 4%; ulcer: 12.5%; dryness: 29%                                                                                                                                                                                                                                                                                                                              |
| Santos (2004) <sup>77</sup><br>Randomized, double-blind, prospective, placebo-controlled, parallel<br>See Supplementary Table 3 | 0.05% CHX + 0.05% CPC                                                     | Yes | 33  | 14 days   | dryness mouth 3; taste alteration 6; burning 3                                                                                                                                                                                                                                                                                                                                                             |
|                                                                                                                                 | Placebo                                                                   |     |     |           | hypersensitivity 1                                                                                                                                                                                                                                                                                                                                                                                         |

|                                                                                                 |                                      |     |     |          |                                                                                                                     |
|-------------------------------------------------------------------------------------------------|--------------------------------------|-----|-----|----------|---------------------------------------------------------------------------------------------------------------------|
| Sharma (2003) <sup>59</sup><br>Examiner-blind, parallel group                                   | 0.15 hexetidine                      | No  | 139 | 15 days  | teeth staining 4%                                                                                                   |
|                                                                                                 | 0.12 CHX                             |     |     |          | teeth staining 66%                                                                                                  |
|                                                                                                 | Placebo                              |     |     |          | no AE                                                                                                               |
| Solís (2011) <sup>33</sup><br>Crossover randomized double masked<br>See Supplementary Table 3   | CHX 0.2% with ADS                    | Yes | 15  | 15 days  | Two patients reported a bad taste with both mouthwashes – no further specification                                  |
|                                                                                                 | CHX 0.2%                             |     |     |          |                                                                                                                     |
| Stokey (2005) <sup>28</sup><br>Randomized parallel with 3 arms                                  | 0.075% CPC                           | Yes | 336 | 6 months | 3 months: more tongue lesions in CPC and CHX groups; no differences at 3 and 6 months for CPC and placebo           |
|                                                                                                 | 0.1% CPC                             |     |     |          |                                                                                                                     |
|                                                                                                 | 0.12% CHX                            |     |     |          |                                                                                                                     |
|                                                                                                 | Placebo                              |     |     |          |                                                                                                                     |
| Türkoğlu (2009) <sup>68</sup><br>Parallel 2 arms                                                | CHX                                  | Yes | 50  | 4 weeks  | teeth staining 56%; mucosal irritation 3%; taste disturbance 20%; mucosal ulceration 12%                            |
|                                                                                                 | Placebo                              |     |     |          | no AE                                                                                                               |
| Zimmer (2015) <sup>19</sup><br>Four arms parallel blind randomized<br>See Supplementary Table 3 | 0.06% CHX+0.025% NaF+Alcohol         | Yes | 155 | 8 weeks  | teeth staining 4 weeks: 17; 8 weeks: 18<br>tongue staining 4 weeks: 12; 8 weeks: 18                                 |
|                                                                                                 | 0.06% CHX+0.025% NaF                 |     |     |          | teeth staining 4 weeks: 9; 8 weeks: 21<br>tongue staining 4 weeks: 11; 8 weeks: 22<br>gastrointestinal infection 1  |
|                                                                                                 | 0.06% CHX+0.025% NaF+0.03% CPC       |     |     |          | teeth staining 4 weeks: 18; 8 weeks: 25<br>tongue staining 4 weeks: 16; 8 weeks: 23<br>gastrointestinal infection 4 |
|                                                                                                 | Only brushing twice daily            |     |     |          | teeth staining 4 weeks: 3; 8 weeks: 8<br>tongue staining 4 weeks: 8; 8 weeks: 14                                    |
| Bagan (2012) <sup>42</sup><br>Double-blind, randomized, two arms parallel                       | EO with 26.9% alcohol                | N/A | 60  | 6 months | No cytological changes in the oral mucosa; no AE reported                                                           |
|                                                                                                 | EO without alcohol                   |     |     |          |                                                                                                                     |
| Borden (2002) <sup>37</sup><br>Parallel randomized with 2 arms                                  | EO                                   | Yes | 138 | 1 month  | No AE reported                                                                                                      |
|                                                                                                 | CPC                                  |     |     |          |                                                                                                                     |
| Botelho (2009) <sup>38</sup><br>Open randomized parallel with 2 arms                            | Lippia sidoides EO 1%                | No  | 55  | 1 month  | Burning 44%; altered taste 22%                                                                                      |
|                                                                                                 | CHX 0.12%                            |     |     |          | Burning 14%; altered taste 21%                                                                                      |
| Charles (2001) <sup>39</sup><br>Triple blind parallel randomized                                | EO                                   | Yes | 316 | 6 months | No AE reported                                                                                                      |
|                                                                                                 | Antiplaque/antigingivitis dentifrice |     |     |          |                                                                                                                     |
|                                                                                                 | Placebo                              |     |     |          |                                                                                                                     |
| Cortelli (2012) <sup>22</sup><br>Randomized blinded parallel                                    | Zinc chloride and sodium fluoride    | Yes | 480 | 6 months | No AE recorded                                                                                                      |
|                                                                                                 | 0.05% CPC                            |     |     |          |                                                                                                                     |

|                                                                                 |                                            |     |     |          |                                                                                                                                                                                                                                                                                                                                                                                                              |
|---------------------------------------------------------------------------------|--------------------------------------------|-----|-----|----------|--------------------------------------------------------------------------------------------------------------------------------------------------------------------------------------------------------------------------------------------------------------------------------------------------------------------------------------------------------------------------------------------------------------|
| Cortelli (2013) <sup>23</sup><br>Randomized parallel                            | Alcohol free EO                            | Yes | 337 | 6 months | Oral mucosa exfoliation, dry mouth 2; oral pain 1                                                                                                                                                                                                                                                                                                                                                            |
|                                                                                 | Placebo                                    |     |     |          | Glossodynia 1; oral discomfort 1                                                                                                                                                                                                                                                                                                                                                                             |
|                                                                                 | Alcohol free CPC                           |     |     |          | Dry mouth 1; dysguesia 1                                                                                                                                                                                                                                                                                                                                                                                     |
| Cortelli (2014) <sup>24</sup><br>Randomized, blinded parallel                   | EOs                                        | Yes | 338 | 6 months | Glossodynia 1                                                                                                                                                                                                                                                                                                                                                                                                |
|                                                                                 | 0.07% CPC                                  |     |     |          | Aphthous stomatitis 1; dysguesia 2                                                                                                                                                                                                                                                                                                                                                                           |
|                                                                                 | 5% alcohol                                 |     |     |          | No AE reported                                                                                                                                                                                                                                                                                                                                                                                               |
| Cosyn (2013) <sup>41</sup><br>Parallel with 2 arms                              | EO                                         | Yes | 25  | 2 months | No AE reported                                                                                                                                                                                                                                                                                                                                                                                               |
|                                                                                 | Placebo                                    |     |     |          |                                                                                                                                                                                                                                                                                                                                                                                                              |
| Kerr (2015) <sup>40</sup><br>Randomized, blinded, parallel                      | 21.6% alcohol EO                           | Yes | 108 | 3 months | AE (dry mouth) 35 % in alcohol and 7% non alcohol group                                                                                                                                                                                                                                                                                                                                                      |
|                                                                                 | Non alcohol based                          |     |     |          |                                                                                                                                                                                                                                                                                                                                                                                                              |
| Lauten (2005) <sup>35</sup><br>Randomized placebo-controlled                    | EO                                         | Yes | 17  | 3 months | Light-headiness in 1 case of EO                                                                                                                                                                                                                                                                                                                                                                              |
|                                                                                 | Placebo                                    |     |     |          |                                                                                                                                                                                                                                                                                                                                                                                                              |
| Parikh-Das (2013) <sup>35</sup><br>Parallel randomized with 3 arms              | EO                                         | No  | 185 | 2 weeks  | No AE reported, except they occurred less in EO group                                                                                                                                                                                                                                                                                                                                                        |
|                                                                                 | 0.075% CPC                                 |     |     |          |                                                                                                                                                                                                                                                                                                                                                                                                              |
|                                                                                 | 5% hydroalcohol                            |     |     |          |                                                                                                                                                                                                                                                                                                                                                                                                              |
| Albert-Kiszely (2007) <sup>29</sup><br>Parallel with 2 arms                     | 0.7% CPC                                   | Yes | 151 | 6 months | Pain 4; stomatitis 1; gingivitis 1; dyspepsia 2; lost to follow-up 2                                                                                                                                                                                                                                                                                                                                         |
|                                                                                 | EO                                         |     |     |          | Pain 1; stomatitis 3; gingivitis 1; hyperesthesia 2; herpes simplex lesions 1; development of a periodontal abscess 1; dyspepsia 2                                                                                                                                                                                                                                                                           |
| Costa (2012) <sup>15</sup><br>Parallel with 2 arms<br>See Supplementary Table 3 | 0.07% CPC                                  | Yes | 67  | 6 months | After 3 months: taste perception 1; strange flavour but not disgusting 1; itchy feeling when rinsing 2<br>After 6 months: teeth staining by Lobene index: 1                                                                                                                                                                                                                                                  |
|                                                                                 | Placebo                                    |     |     |          | After 3 months: taste alterations 1; taste of blood and bad breath 1; transparent appearance and salty flavour 1;<br>Teeth staining by Lobene index                                                                                                                                                                                                                                                          |
| Herrera (2005) <sup>20</sup><br>Crossover study                                 | 0.15% benzydamine hydrochloride +0.05% CPC | Yes | 24  | 4 days   | On a scale 0=absent, 1=mild; 2=moderate; 3=severe<br>Tingling 1 <sup>st</sup> test: absent 6, mild 5, moderate 10, severe 3; 2 <sup>nd</sup> test: absent 19, mild 5, moderate 0, severe 0<br>Taste alternation. 1 <sup>st</sup> test: absent 22, moderate 2; 2 <sup>nd</sup> test: absent 21, mild 1, moderate 2<br>Dry mouth: 1 <sup>st</sup> test: absent 23, moderate 1; 2 <sup>nd</sup> test: absent 24 |
|                                                                                 | CPC                                        |     |     |          | On a scale 0=absent, 1=mild; 2=moderate; 3=severe<br>Tingling absent 19; mild 3, moderate-2                                                                                                                                                                                                                                                                                                                  |
|                                                                                 | Placebo                                    |     |     |          |                                                                                                                                                                                                                                                                                                                                                                                                              |
| Hu (2003) <sup>13</sup><br>Parallel 2 arms                                      | 0.1% CPC                                   | Yes | 120 | 14 days  | Staining control 5% mild taste loss 1.6%                                                                                                                                                                                                                                                                                                                                                                     |
|                                                                                 | Chlorine                                   |     |     |          |                                                                                                                                                                                                                                                                                                                                                                                                              |
| Mankodi (2005) <sup>26</sup><br>parallel double with 2 arms                     | 0.07 CPC alcohol free                      | Yes | 139 | 6 months | No AE reported                                                                                                                                                                                                                                                                                                                                                                                               |
|                                                                                 | Placebo                                    |     |     |          |                                                                                                                                                                                                                                                                                                                                                                                                              |
| Rioboo (2012) <sup>12</sup><br>Double blind parallel with 2 arms                | 0.05% CPC                                  | Yes | 58  | 30 days  | No AE reported                                                                                                                                                                                                                                                                                                                                                                                               |
|                                                                                 | Placebo                                    |     |     |          |                                                                                                                                                                                                                                                                                                                                                                                                              |
| Van Leeuwen (2015) <sup>16</sup><br>Double blind parallel placebo controlled    | 0.07% CPC                                  | Yes | 62  | 6 months | Teeth staining in 1 patient                                                                                                                                                                                                                                                                                                                                                                                  |
|                                                                                 | Placebo                                    |     |     |          | No AE                                                                                                                                                                                                                                                                                                                                                                                                        |
| Witt (2005) <sup>30</sup><br>Parallel with 2 arms                               | 0.07% CPC                                  | Yes | 75  | 21 days  | No AE reported                                                                                                                                                                                                                                                                                                                                                                                               |
|                                                                                 | EO and 21.6% ethyl alcohol                 |     |     |          |                                                                                                                                                                                                                                                                                                                                                                                                              |

CHX: Chlorhexidine; EO: Essential Oils; CPC: Cetylpyridinium Chloride; PVP: polyvinylpyrrolidone; ADS: anti discoloration system; N/A: not available
