# Supplementary material for: Adverse events associated with home use of mouthrinses: a systematic review
Source: PubMed Central journal article supplement — Ther Adv Drug Saf. 2019 Sep 23;10:2042098619854881. doi: 10.1177/2042098619854881 (PMC6759706; doi:10.1177/2042098619854881), 2019-09-23
Supplement: review_MW_Supplementary_Table_3_final.pdf [file review_MW_Supplementary_Table_3_final.pdf]

Supplementary Table 3. Publications with reported inter-group significance of adverse events

| Publication and study design                                               | Intervention and Comparator                                                                               | No. Subjects | Main AE outcome                                                                                                  | Statistical Significance                                                                                                                                                                                                                                                                     |
|----------------------------------------------------------------------------|-----------------------------------------------------------------------------------------------------------|--------------|------------------------------------------------------------------------------------------------------------------|----------------------------------------------------------------------------------------------------------------------------------------------------------------------------------------------------------------------------------------------------------------------------------------------|
| Lang (1998) <sup>45</sup><br>Randomized parallel double blind              | Delmopinol hydrochloride 2.0 mg                                                                           | 53           | Tooth staining 20% 3 months; 16% 6 months                                                                        | Significant differences between placebo and delmopinol ( $p < 0.01$ ) and placebo and CHX ( $p < 0.001$ )                                                                                                                                                                                    |
|                                                                            | Placebo                                                                                                   | 50           | No AE                                                                                                            |                                                                                                                                                                                                                                                                                              |
|                                                                            | CHX digluconate 2.0 mg                                                                                    | 53           | Tooth staining 3 months 69%; 6 months 88%                                                                        |                                                                                                                                                                                                                                                                                              |
| Yeung (1995) <sup>94</sup><br>Double-blind parallel with 2 arms            | Delmopinol 2 mg/ml HCL                                                                                    | 22           | tongue numbness 12; oral mucosa desquamation 3; burning sensation 1; taste loss 1; altered taste 3; oral ulcer 2 | No significant differences between groups in all AE ( $p > 0.05$ )                                                                                                                                                                                                                           |
|                                                                            | Placebo                                                                                                   | 25           | oral mucosa desquamation 1; oral ulcer 4; sore gums 2                                                            |                                                                                                                                                                                                                                                                                              |
| Bascones (2005) <sup>11</sup><br>Double masked crossover with 3 phases     | 0.12% CHLX + 0.05% NaF                                                                                    | 30           | Tongue staining 3                                                                                                | Tongue staining: significant differences between the treatments ( $p = 0.0141$ ). During the treatment with CHX-CPC, the frequency of tongue staining was greater than that observed with CHX-NaF ( $p = 0.0078$ ) and CHX ( $p = 0.0467$ )                                                  |
|                                                                            | 0.12% CHX                                                                                                 | 30           | Tongue staining 5                                                                                                |                                                                                                                                                                                                                                                                                              |
|                                                                            | CHX+0.05% CPC chloride                                                                                    | 30           | Tongue staining 12                                                                                               |                                                                                                                                                                                                                                                                                              |
| Brex (1993) <sup>56</sup><br>Triple blind parallel randomized              | 125 ppm F from americium fluoride and 125 ppm F from stannous fluoride, 5.0% alcohol and 0.025% aspartame | 9            | Teeth staining as discoloration index                                                                            | Placebo: less staining than active groups ( $p < 0.001$ ). CHX groups: at all time points higher staining than fluoride group ( $p < 0.001$ ).                                                                                                                                               |
|                                                                            | 0.2% CHX digluconate and 5.0% alcohol                                                                     | 10           |                                                                                                                  |                                                                                                                                                                                                                                                                                              |
|                                                                            | Placebo                                                                                                   | 12           |                                                                                                                  |                                                                                                                                                                                                                                                                                              |
| Ciancio (1992) <sup>83</sup><br>Randomized double-blind                    | 0.1% stannous fluoride                                                                                    | 27           | Tooth staining by Lobene index                                                                                   | No significant differences between groups ( $p > 0.05$ )                                                                                                                                                                                                                                     |
|                                                                            | Placebo                                                                                                   | 28           |                                                                                                                  |                                                                                                                                                                                                                                                                                              |
| Horwitz (2000) <sup>65</sup><br>Parallel double blind                      | Americium fluoride/ stannous fluoride AmF/SnF <sub>2</sub>                                                | 15           | Tooth staining (as % of tooth with no visible staining)<br>3 weeks – 0.47 ± 0.21<br>12 weeks – 0.72 ± 0.19       | At 3 weeks – significant ( $p = 0.025$ ), at 6 weeks – not significant ( $p > 0.05$ ) differences between groups                                                                                                                                                                             |
|                                                                            | 0.12% CHX                                                                                                 | 17           | 3 weeks – 1.12 ± 0.19<br>6 weeks – 0.60 ± 0.13                                                                   |                                                                                                                                                                                                                                                                                              |
| Kumar (2013) <sup>63</sup><br>Randomized parallel double blind with 3 arms | 0.2% CHX gluconate                                                                                        | 16           | Oral itching 5 oral soreness 4                                                                                   | No significant difference between the three treatments for the occurrence of adverse events (Chi-squared test = 1.95; $P = 0.377$ )                                                                                                                                                          |
|                                                                            | 0.03% triclosan + 0.025% sodium fluoride NaF + 12% ethyl alcohol                                          | 16           | Oral itching 8<br>Aphthous ulcer 4                                                                               |                                                                                                                                                                                                                                                                                              |
|                                                                            | 0.2% CHX + 0.3% triclosan + 0.3% NaF + 0.09% Zn chloride ZnCl <sub>2</sub>                                | 16           | Oral itching 5 dryness 4                                                                                         |                                                                                                                                                                                                                                                                                              |
| Duss (2010) <sup>48</sup><br>Randomized parallel with 2 arms               | 0.05 CHX/herbal extract combination                                                                       | 23           | Staining by Lobene index                                                                                         | At weeks 4 and 12, more staining in the control group ( $p < 0.05$ and $p < 0.001$ , respectively). A higher risk for staining in the control group (crude OR: 2.3:1, 95% CI: 1.3 to 4.4, $p < 0.01$ ).                                                                                      |
|                                                                            | 0.1% CHX                                                                                                  | 22           |                                                                                                                  |                                                                                                                                                                                                                                                                                              |
| Charles (2004) <sup>57</sup><br>Randomized blind parallel                  | EO                                                                                                        | 34           | Tooth staining by Lobene extrinsic tooth stain index                                                             | At 3 and 6 months, significantly more gingival region stain in the EO group ( $p < 0.05$ ) and the CHX group ( $p < 0.001$ ) compared with the control group; at both examinations, the level of stain in the CHX group was significantly greater ( $p < 0.001$ ) than that in the EO group. |
|                                                                            | 0.12% CHX                                                                                                 | 36           |                                                                                                                  |                                                                                                                                                                                                                                                                                              |
|                                                                            | 5% alcohol                                                                                                | 38           |                                                                                                                  |                                                                                                                                                                                                                                                                                              |

|                                                                            |                                                   |    |                                                                                                                                                                                                                                                             |                                                                                                                                                                                                                                                                                                                                                                                                                         |
|----------------------------------------------------------------------------|---------------------------------------------------|----|-------------------------------------------------------------------------------------------------------------------------------------------------------------------------------------------------------------------------------------------------------------|-------------------------------------------------------------------------------------------------------------------------------------------------------------------------------------------------------------------------------------------------------------------------------------------------------------------------------------------------------------------------------------------------------------------------|
| Cortellini (2008) <sup>53</sup><br>Cross over and 2 arms                   | 0.2% CHX+ADS                                      | 24 | Teeth staining 1 <sup>st</sup> week: 2/23 in Incisal, 9/23 in approx, 2/23 in gingiva; 2 <sup>nd</sup> week: 6/24 in Incisal, 15/24 in approx, 5/24 in gingiva<br>1 <sup>st</sup> week: gingival inflammation 35%; oedema 35%; mucosal irritation 1.0%      | No significant differences between the two treatments for any of other than staining variables.<br>At week 1, CHX caused consistently less pigmentations than the control CHX in all the evaluated areas of the dental surfaces (odds ratio (OR)=0.083 p<0.0001 in the incisal area, OR=0.036 p<0.0001 in the approximal area and OR=0.065 p<0.0001 in the gingival area)                                               |
|                                                                            | 0.2% CHX                                          | 24 | Teeth staining 1 <sup>st</sup> week: 17/24 in Incisal, 20/24 in approx, 14/24 in gingiva; 2 <sup>nd</sup> week: 12/23 in Incisal, 22/23 in approx, 12/23 in gingiva<br>1 <sup>st</sup> week: gingival inflammation 21%; oedema 42%; mucosal irritation 1.0% |                                                                                                                                                                                                                                                                                                                                                                                                                         |
| Eldridge (1998) <sup>36</sup><br>Parallel 3 arms                           | 0.12% alcohol free CHX                            | 10 | Brown hairy tongue: 80%                                                                                                                                                                                                                                     | The CHX groups had significantly more AE (p<0.05) than the EO group.                                                                                                                                                                                                                                                                                                                                                    |
|                                                                            | EO                                                | 11 | Brown hairy tongue: 9.10%                                                                                                                                                                                                                                   |                                                                                                                                                                                                                                                                                                                                                                                                                         |
|                                                                            | 0.12% CHX                                         | 11 | Brown hairy tongue: 54.50%                                                                                                                                                                                                                                  |                                                                                                                                                                                                                                                                                                                                                                                                                         |
| Ernst (1998) <sup>49</sup><br>Parallel randomized 2 arms                   | 0.2% CHX Gluconate                                | 65 | Teeth staining increased from 30.4% to 45.2%, mucosal irritation 1.5%, taste change 27.60%                                                                                                                                                                  | No significant differences in teeth staining between groups.                                                                                                                                                                                                                                                                                                                                                            |
|                                                                            | 0.1% CHX                                          | 65 | Teeth staining increased from 34.2% to 48.4%, taste change 18.40%                                                                                                                                                                                           |                                                                                                                                                                                                                                                                                                                                                                                                                         |
| Ernst (2005) <sup>58</sup><br>Parallel randomized double-blind with 3 arms | CHX                                               | 30 | Teeth staining as Discoloration index                                                                                                                                                                                                                       | Significant differences (p=0.0056) when all three groups compared. When CHX and Hexatidine group compared, significant difference (p=0.0035) after 4 weeks, but not significant (p=0.757) after 14 days. When CHX and placebo were compared, significant differences after 14 days (p=0.015) and 4 weeks (p=0.0001). No sign differences when placebo and CHX were compared at 14 days (p=0.1464) or 4 weeks (p=0.1262) |
|                                                                            | Hexatidine                                        | 30 |                                                                                                                                                                                                                                                             |                                                                                                                                                                                                                                                                                                                                                                                                                         |
|                                                                            | Placebo                                           | 30 |                                                                                                                                                                                                                                                             |                                                                                                                                                                                                                                                                                                                                                                                                                         |
| Escribano (2010) <sup>18</sup><br>Parallel 2 arms                          | 0.05% CHX digluconate+0.05% CPC+other ingredients | 25 | Tooth staining 14<br>Burning feeling o 14                                                                                                                                                                                                                   | Tooth staining tendency towards statistical significance (p=0.07). The same occurred for the burning feeling of the mouth, (p=0.08). No significant differences between groups for any of the other patient-centred variables                                                                                                                                                                                           |
|                                                                            | Placebo                                           | 22 | Tooth staining 4<br>Burning feeling o 4                                                                                                                                                                                                                     |                                                                                                                                                                                                                                                                                                                                                                                                                         |
| Gürgan (2006) <sup>67</sup><br>Parallel 2 arms                             | 0.2% CHX                                          | 40 | Numerous side effects reported                                                                                                                                                                                                                              | All subjective side effects. significantly higher frequencies in the test group compared to the placebo, except for pain and pruritus. Significant differences in the results for the rest of the oral mucosa in the test group compared to the placebo group. Significant differences between the test and placebo groups for discolorations of tongue and tooth surfaces ( $\chi^2$ and Fisher exact tests)           |
|                                                                            | Placebo                                           | 40 |                                                                                                                                                                                                                                                             |                                                                                                                                                                                                                                                                                                                                                                                                                         |
| Jenkins (1993) <sup>69</sup><br>Double blinded parallel randomized         | 0.12% CHX+NaF                                     | 51 | stain area: 49% (objective), 82% (subjective); stain intensity 1.03 (buccal), 1.06 (lingual); soreness 2                                                                                                                                                    | For all stain areas the differences between groups were significant (p<0.001). For stain intensity differences between groups were significant (p<0.001). Soreness and tingling not significant; for taste change, significant (p<0.05) change (Mann-Whitney test)                                                                                                                                                      |
|                                                                            | Placebo                                           | 51 | stain area: 4% (objective) 14% (subjective); stain intensity 0.14 (buccal), 0.42 (lingual); soreness 1                                                                                                                                                      |                                                                                                                                                                                                                                                                                                                                                                                                                         |
| Leyes Borrajo (2002) <sup>70</sup><br>Double blind 3 parallel groups       | 0.12% CHX +Alcohol                                | 30 | Tooth staining 27                                                                                                                                                                                                                                           | Significant differences between groups found, Chi square test of independence, p<0.05                                                                                                                                                                                                                                                                                                                                   |
|                                                                            | 0.12 CHX without alcohol                          | 27 | Tooth staining 30                                                                                                                                                                                                                                           |                                                                                                                                                                                                                                                                                                                                                                                                                         |
|                                                                            | Placebo                                           | 39 |                                                                                                                                                                                                                                                             |                                                                                                                                                                                                                                                                                                                                                                                                                         |

|                                                                                                    |                                                                           |    |                                                                                                                          |                                                                                                                                                                                                                                |
|----------------------------------------------------------------------------------------------------|---------------------------------------------------------------------------|----|--------------------------------------------------------------------------------------------------------------------------|--------------------------------------------------------------------------------------------------------------------------------------------------------------------------------------------------------------------------------|
| Olsson (2012) <sup>50</sup><br>Randomized double-blind crossover                                   | Alcohol based 0.1% CHX                                                    | 10 | Tooth staining as 1=no stain, 2=spots, 3=abundant stain. Patient assessment of change in taste and smarting by VAS score | All differences between groups were non-significant (Mann-Whitney test)                                                                                                                                                        |
|                                                                                                    | Alcohol free 0.12% CHX                                                    | 10 |                                                                                                                          |                                                                                                                                                                                                                                |
| Quiryren (2001) <sup>27</sup><br>Double-blind, randomised, crossover                               | CHX 0.12 % alcohol, CHX 0.2 % 0.05% CPC, CHX 0.12 % sodium fluoride 0.05% | 16 | Tooth staining (mean Quigley and Hein score) remained low                                                                | No significant differences between groups ( $p>0.75$ ) in all cases                                                                                                                                                            |
|                                                                                                    | CHX 0.2 % alcohol                                                         | 16 |                                                                                                                          |                                                                                                                                                                                                                                |
| Santhosh (2010) <sup>51</sup><br>Randomized double blind crossover                                 | 0.2% CHX                                                                  | 24 | Oral itching 25% oral soreness 29% burning 8% ulcer 20% dryness 16%                                                      | No significant differences                                                                                                                                                                                                     |
|                                                                                                    | CHX+NaF+ZnCl <sub>2</sub>                                                 | 24 | Oral itching 4% oral soreness 25% burning 4% ulcer 12.5% dryness 29%                                                     |                                                                                                                                                                                                                                |
| Santos (2004) <sup>17</sup><br>Randomized, double-blind, prospective, placebo-controlled, parallel | 0.05% CHX + 0.05% CPC                                                     | 17 | Tooth staining                                                                                                           | Significant difference in intensity of staining ( $p=0.02$ , Mann-Whitney test) between groups.                                                                                                                                |
|                                                                                                    | Placebo                                                                   | 16 | Tooth staining                                                                                                           |                                                                                                                                                                                                                                |
| Solís (2011) <sup>55</sup><br>Crossover randomized double masked                                   | CHX 0.2% with ADS                                                         | 15 | Teeth staining                                                                                                           | Significant less tooth staining with the test group ( $p < 0.01$ )                                                                                                                                                             |
|                                                                                                    | CHX 0.2%                                                                  | 15 |                                                                                                                          |                                                                                                                                                                                                                                |
| Zimmer (2015) <sup>19</sup><br>Four arms parallel blind randomized                                 | 0.06% CHX+ 0.025% NaF+Alcohol                                             | 39 | teeth staining 4 weeks: 17; 8 weeks: 18<br>tongue staining 4 weeks: 12; 8 weeks: 18                                      | No significant differences between groups for discoloration of the tongue. For tooth staining significant more occurrences in the three rinsing groups when compared to the negative control ( $P < 0.001$ , Chi square test). |
|                                                                                                    | 0.06% CHX+ 0.025% NaF                                                     | 39 | teeth staining 4 weeks: 9; 8 weeks: 21<br>tongue staining 4 weeks: 11; 8 weeks: 22<br>gastrointestinal infection 1       |                                                                                                                                                                                                                                |
|                                                                                                    | 0.06% CHX+ 0.025% NaF+0.03% CPC                                           | 37 | teeth staining 4 weeks: 18; 8 weeks: 25<br>tongue staining 4 weeks: 16; 8 weeks: 23<br>gastrointestinal infection 4      |                                                                                                                                                                                                                                |
|                                                                                                    | Only brushing twice daily                                                 | 40 | teeth staining 4 weeks: 3; 8 weeks: 8<br>tongue staining 4 weeks: 8; 8 weeks: 14                                         |                                                                                                                                                                                                                                |
| Costa (2012) <sup>15</sup><br>Parallel with 2 arms                                                 | 0.07 %CPC                                                                 | 35 | Staining by Lobene index                                                                                                 | Significant higher levels of staining observed in the test group after 3 ( $p = 0.007$ ) and 6 months ( $p < 0.001$ )                                                                                                          |
|                                                                                                    | Placebo                                                                   | 32 |                                                                                                                          |                                                                                                                                                                                                                                |

AE: adverse events; CHX: Chlorhexidine; EO: Essential Oils; CPC: Cetylpyridinium Chloride; ADS: anti discoloration system
